# Supplementary material for: Copper(II), cobalt(II), nickel(II) and zinc(II) complexes containing the enolate of N-acetyl-3-butanoyltetramic acid (Habta) and its phenylhydrazone derivative analogues. Crystal structure of [Cu(abta)2(py)2]·2H2O †
Source: Royal Society of Chemistry journal article supplement (doi:10.1039/b007252o), 2001-01-01
Supplement: b007252o.doc [file b007252o.doc]

**Supplementary** **data**

# **Copper(II), Cobalt(II), Nickel(II) and Zinc(II) complexes containing the enolate of *N*-acetyl-3-butanoyltetramic acid (Habta) and its phenylhydrazone derivative analogues. Crystal structure of [Cu(abta)2(py)2].2H2O**

# Efstathios Gavrielatos*a*, Christos Mitsos*a*, Giorgos Athanasellis*a*, Brian T. Heatonc, Alexander Steinerc, Jamie F. Bickleyc, Olga Igglessi-Markopoulou*,a and John Markopoulosb

*a Laboratory of Organic Chemistry, Department of Chemical Engineering, National Technical University of Athens, Zografou Campus, GR-15773 Athens, Greece*

*b Laboratory of Inorganic Chemistry, Department of Chemistry, University of Athens, Panepistimiopolis, GR-15771 Athens, Greece*

*c Department of Chemistry, Donnan Laboratories, University of Liverpool, PO Box 147, Liverpool L69 3BX, UK*

**Table 1**  Complexes of N-Acetyl-3-Butanoyl-4-hydroxy-pyrrolin-2-one (Habta);

Colours and Elemental Analyses

|  | | | Elemental Analysisa (%) | | | |
| --- | --- | --- | --- | --- | --- | --- |
| Complex | | Colour | | C | H | N |
| **1** | Cu(CH3COO)(abta).H2O | green | 41.3(41.1) | | 4.7(4.8) | 4.1(4.0) |
| **2** | Cu(abta)2.2H2O | light blue | 46.3(46.2) | | 5.7(5.4) | 5.1(5.4) |
| **3** | Co(CH3COO)(abta). 3Η2Ο | purple | 37.5(37.7) | | 5.1(5.5) | 3.5(3.7) |
| **4** | Co(abta)2.3H2O | pink | 45.3(45.1) | | 5.4(5.6) | 5.4(5.3) |
| **5** | Ni(CH3COO)(abta). 2Η2Ο | green-blue | 39.8(39.6) | | 5.2(5.2) | 3.9(3.8) |
| **6** | Ni(abta)2. 2Η2Ο | green | 51.1(51.2) | | 5.1(5.0) | 5.1(5.0) |
| **7** | Zn(bta)2.2H2O | white | 44.1(43.9) | | 5.3(5.5) | 6.2(6.4) |
| **8** | Zn(abta)2.2H2O | white | 46.3(46.0) | | 5.5(5.4) | 5.6(5.4) |

aTheoretical values in parentheses.

**Table 2.** Complexes of Phenylhydrazone of N-Acetyl-3-Butanoyl tetramic acid (HPhabta); Colours and Elemental Analyses

|  | | | | | Elemental Analysisa (%) | | |
| --- | --- | --- | --- | --- | --- | --- | --- |
| Complex | | Colour | | C | | H | N |
| **9** | Cu(CH3COO)(Phabta).2H2O | green | 47.2(47.1) | | | 5.3(5.4) | 8.9(9.1) |
| **10** | Cu(Phabta)2.4H2O | black | 52.4(52.2) | | | 5.8(6.0) | 11.1(11.4) |
| **11** | Co(CH3COO)( Phabta).2Η2Ο | brown | 51.9(51.7) | | | 6.4(6.5) | 9.9(10.0) |
| **12** | Zn(CH3COO)( Phbta).2H2O | orange | 50.0(50.2) | | | 4.9(5.0) | 9.4(9.3) |

aTheoretical values in parentheses.
